# Supplementary material
Source: ML conference proceedings conference paper supplement (https://openaccess.thecvf.com/content/ICCV2023/html/Jiang_Probabilistic_Triangulation_for_ICCV_2023_paper.html)
Supplement: Supplementary file 1 [file Jiang_Probabilistic_Triangulation_for_ICCV_2023_supplemental.pdf]

# Probabilistic Triangulation for Uncalibrated Multi-View 3D Human Pose Estimation

Boyuan Jiang<sup>1,2</sup>, Lei Hu<sup>1,2</sup>, Shihong Xia<sup>1,2\*</sup>

<sup>1</sup>Institute of Computing Technology, Chinese Academy of Sciences;

<sup>2</sup>University of Chinese Academy of Sciences

{jiangboyuan20s, hulei19z, xsh}@ict.ac.cn

## 1. Formula details

### 1.1. heatmap-based representation

We define the uncalibrated 3D human pose estimation problem in the main text:

$$\min_{X^{3D}, y} E [proj(X^{3D}, y) - X^{2D}] \quad (1)$$

When using heatmap-based representation of human pose, it is assumed that  $X^{2D}$  is the edge distribution of  $X^{3D}$ , and problem1 is transformed into:

$$\min_{y, X^{3D}} \sum_i^N \int_{\sigma_i} \left\| x_i^{2D}(\sigma_i) - \int_{proj(z, y_i) = \sigma_i} x^{3D}(z) dz \right\|_2 d\sigma_i \quad (2)$$

where  $z$  denotes the body element in 3D space,  $\sigma_i$  denotes the area element of the  $i$ th camera plane, and  $proj(\cdot)$  denotes the projection function.

In order to make the problem2 solvable,  $X^{3D}$  is transformed into an expression for  $X^{2D}$  and  $y$ , a process in which we use approximations:

$$x^{3D}(z) = \frac{1}{N} \sum_{\substack{i \\ proj(z, y_i) = \sigma_i}}^N x_i^{2D}(\sigma_i) \quad (3)$$

$$x_i^{2D}(\sigma_i) = \max_{proj(z, y_i) = \sigma_i} x^{3D}(z)$$

Bringing in the equation 3 the detailed derivation proceeds as follows:

$$\begin{aligned} & \min_y \sum_i^N \int_{\sigma_i} \left\| x_i^{2D}(\sigma_i) - \int_{proj(z, y_i) = \sigma_i} x^{3D}(z) dz \right\|_2 d\sigma_i \\ \Leftrightarrow & \min_y \sum_i^N \left( \sum_{\sigma_i} \left\| x_i^{2D}(\sigma_i) - \frac{\sum_{z \in \{z | proj(z, y_i) = \sigma_i\}} (x^{3D}(z))^2}{\sum_z x^{3D}(z)} \right\|_2 x_i^{2D}(\sigma_i) \right) \\ & / \left( \sum_{\sigma_i} x_i^{2D}(\sigma_i) \right) \\ \Leftrightarrow & \min_y \sum_i^N \sum_{\sigma_i} \left\| \sum_{z \in \{z | proj(z, y_i) = \sigma_i\}} x^{3D}(z) (x_i^{2D}(\sigma_i) - x^{3D}(z)) \right\|_2 x_i^{2D}(\sigma_i) \\ \Leftrightarrow & \min_y \sum_i^N \sum_{\sigma_i} \sum_{z \in \{z | proj(z, y_i) = \sigma_i\}} \left\| (x^{3D}(z) x_i^{2D}(\sigma_i))^2 (x_i^{2D}(\sigma_i) - x^{3D}(z)) \right\|_2 \\ \Leftrightarrow & \min_y \sum_i^N \sum_z \left\| (x^{3D}(z) x_i^{2D}(\sigma_i))^2 (x_i^{2D}(\sigma_i) - x^{3D}(z)) \right\|_2 \\ \Leftrightarrow & \min_y \sum_i^N \left\| \sum_z (x^{3D}(z) x_i^{2D}(\sigma_i))^2 (x_i^{2D}(\sigma_i) - x^{3D}(z)) \right\|_2 \end{aligned} \quad (4)$$

Thus, the problem is simplified to:

$$\min_y \sum_i^N \underbrace{\left\| \sum_z (x^{3D}(z) x_i^{2D}(\sigma_i))^2 (x_i^{2D}(\sigma_i) - x^{3D}(z)) \right\|_2}_{f_i(y)} \quad (5)$$

### 1.2. point-based representation

When  $X^{2D}$  and  $X^{3D}$  use point-based representations, the problem can be transformed into a nonlinear least squares problem from the reprojection error with weights as follows.

$$\min_{y, X^{3D}} \sum_i^N \|w_i^{2D} \circ (\pi(F(x_i^{3D}, y)) - x_i^{2D})\|_2 \quad (6)$$

where  $\pi(\cdot)$  denotes the linear transformation function obtained from the camera intrinsics,  $F(\cdot)$  denotes the projection function obtained from the camera extrinsics, and  $\|\cdot\|_2$  denotes the L2 norm.

\*Corresponding author

First, we establish the constraint relationship between  $y$  and  $X^{3D}$  by projection and triangulation, and define  $x^{2D} = F(x^{3D}, y)$ ,  $x^{3D} = G(x^{2D}, y)$  to simplify the problem. Then the above problem is transformed into:

$$\min_y \sum_i^N \underbrace{\|w_i^{2D} \circ (\pi(F(G(x_i^{2D}, y), y)) - x_i^{2D}))\|_2}_{f_i(y)} \quad (7)$$

### 1.3. KL

$t(y)$  is the impulse function defined at the  $y_{gt}$  point. The derivation of KL dispersion in train loss is as follows.

$$\begin{aligned} \mathcal{L}_{cam} &= D_{KL}(z(y) \| p(y|X^{2D})) \\ &= \int z(y) (\log z(y) - \log p(y|X^{2D})) dy \\ &= \int z(y) \log z(y) dy - \int z(y) \log \frac{p(X^{2D}|y)}{E[p(X^{2D}|y)]} dy \\ &= const - \int z(y) \log p(X^{2D}|y) dy \\ &\quad + \log E [p(X^{2D}|y)] \int z(y) dy \\ &= const - \log p(X^{2D}|y_{gt}) + \log E [p(X^{2D}|y)] \\ &= const - \frac{1}{2} \sum_i^N \|f_i(y_{gt})\|_2 + \log E [p(X^{2D}|y)] \end{aligned} \quad (8)$$
